# Supplementary material for: Parametric strong mode-coupling in carbon nanotube mechanical resonators
Source: Royal Society of Chemistry journal article supplement (doi:10.1039/c6nr02853e), 2016-01-01
Supplement: c6nr02853e1.pdf [file c6nr02853e1.pdf]

Supporting Information for “Parametric Strong Mode-Coupling in  
Carbon Nanotube Mechanical Resonators”

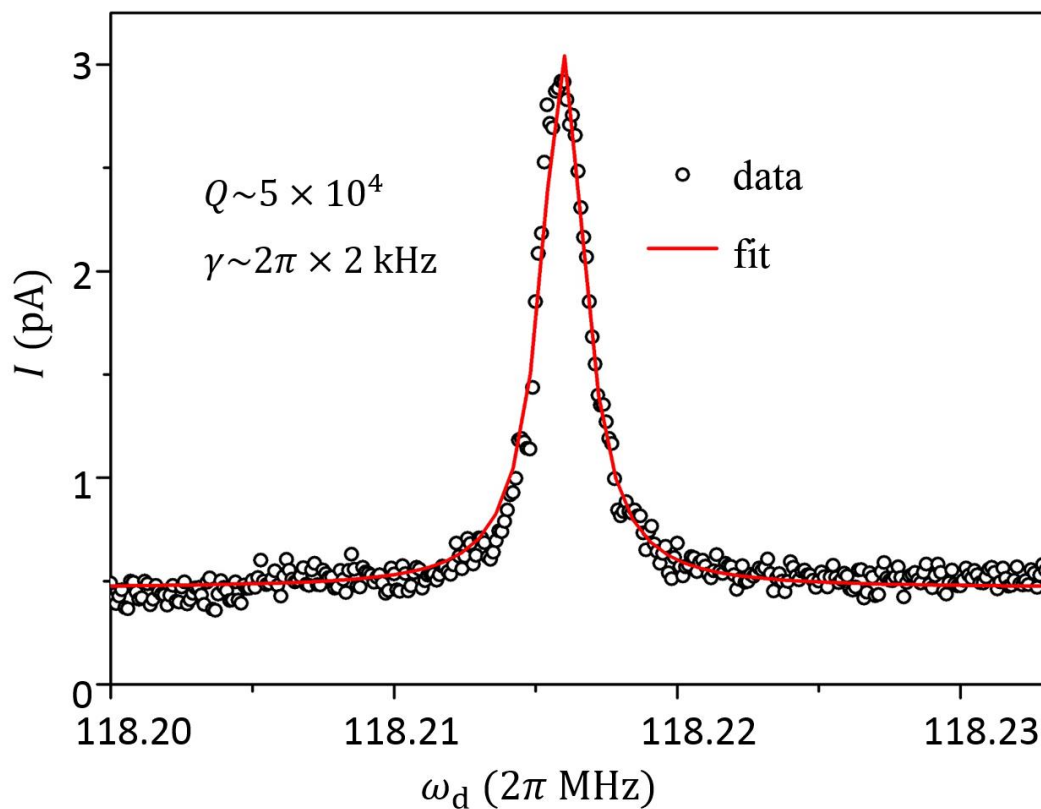

Fig. S1: Fitting the current response as a function of the driving frequency.

The curve is fitted by  $\Delta I(\omega) = B \frac{\omega_0^4/Q^2}{(\omega_0^2 - \omega^2)^2 + \omega_0^2 \omega^2/Q^2}$ ,<sup>S1</sup> where  $B$  is a fit parameter. We show typical fitting results at  $-40$  dBm, obtaining the quality factor  $Q \sim 5 \times 10^4$  and the decoherence rate  $\gamma = \omega_0/Q \sim 2\pi \times 2$  kHz.

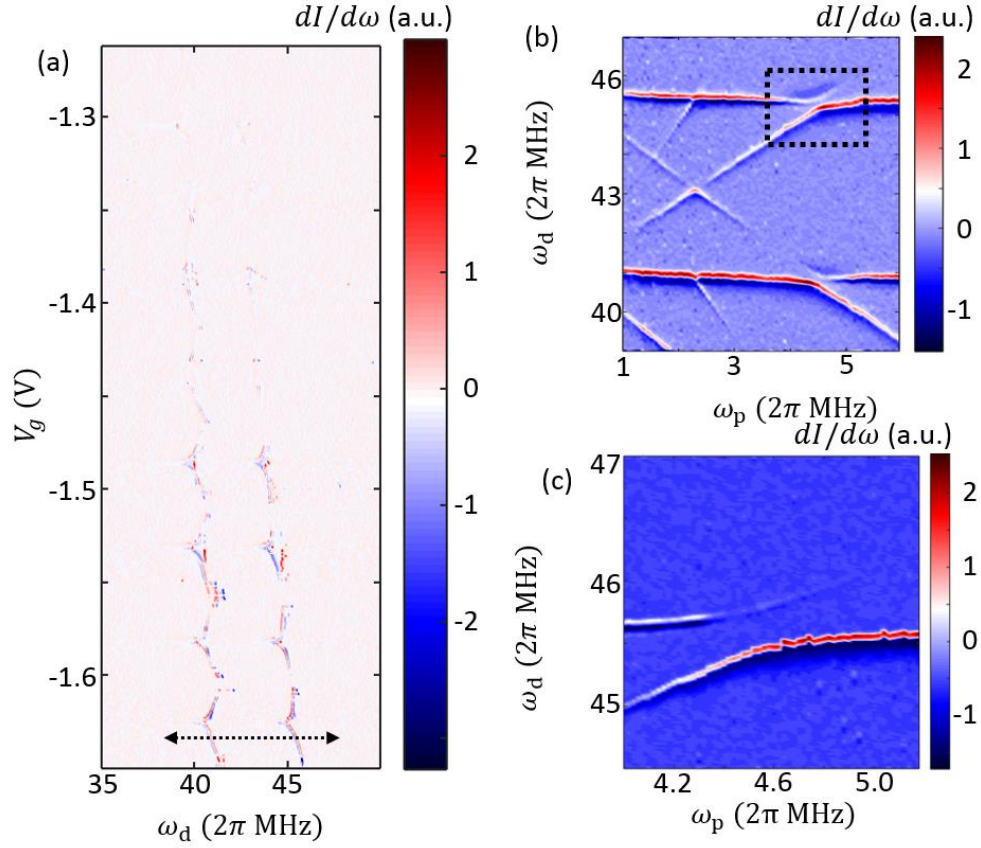

Fig. S2: Two modes coupling for another device. (a) Transport property as a function of gate voltage and driving frequency, where the driving power is  $-50$  dBm. For better resolution, we show the frequency differential results here. (b) Transport property as a function of driving frequency and parametric pump frequency, each with a power of  $-50$  and  $-30$  dBm. The gate voltage is fixed at  $-1.63$  V, shown as the black arrow in (a). Avoided mode splitting is observed in both mechanical resonance, with the pump frequency near  $4.6$  MHz. (c) Zoom of the black dashed box in (b), and the pump power is  $-28$  dBm.

S1. Meerwaldt, H. B.; Labadze, G.; Schneider, B. H.; Taspinar, A.;

Blanter, Y. M.; van der Zant, H. S. J.; Steele, G. A. Phys. Rev. B 2012, 86,  
(11).
